# Supplementary material for: Self-reports map the landscape of task states derived from brain imaging
Source: Research Square preprint supplement (doi:10.21203/rs.3.rs-4131471/v1), 2024-03-21
Supplement: Supplementary file 2 [file 3de8631acf4dd880e92d7b46.docx]

**Predicting Task Performance Metrics using Task Locations in PCA ‘Thought-Space’**

**Method**

To examine the associations between the dimensions of the ‘thought-space’ and task performance, we ran two models in which the outcome variable was either mean accuracy or mean response time with ‘Task’ and the task-average of each of the PCA components (1-5) as the explanatory variables. Two-way interactions between ‘Task’ and each of the PCA components (1-5) were also included. The outcome variables (mean accuracy and mean response time) were z-scored, within each task separately, to adjust for differences in task demands across different tasks. Accordingly, in these models, the main effect of ‘Task’ can be ignored. Mean response time was calculated over correct trials only. In these task performance models, cases exhibiting a z-scored response time or accuracy greater than 2.5 were considered outliers, and the z-scores of these outliers were set to zero to mitigate their influence on the results. The Bonferroni-adjusted alpha level was 0.025 for the two models (reported p-values unadjusted unless otherwise stated). Diagnostic plots confirmed there was homoscedasticity and normality of residuals. In total, data from 8 tasks was included in these models as the other 6 tasks did not record response time or accuracy (N observations = 1520).

Accuracy model formula: lmer(Z-scored Mean Accuracy ~ Task + Task-Mean PC1 + Task-Mean PC2 + Task-Mean PC3 + Task-Mean PC4 + Task-Mean PC5 + Task: Task-Mean PC1 + Task: Task-Mean PC2 + Task: Task-Mean PC3 + Task: Task-Mean PC4 + Task: Task-Mean PC5 + Age + Gender + (1|Participant))

Response time model formula: lmer(Z-scored Mean Response Time ~ Task + Task-Mean PC1 + Task-Mean PC2 + Task-Mean PC3 + Task-Mean PC4 + Task-Mean PC5 + Task: Task-Mean PC1 + Task: Task-Mean PC2 + Task: Task-Mean PC3 + Task: Task-Mean PC4 + Task: Task-Mean PC5 + Age + Gender + (1|Participant))

**Results**

The task accuracy analysis revealed a significant main effect of ‘Intrusive Distraction’ [F(1, 1392) = 60.98, P < 0.001], indicating that this pattern of thought was linked to worse accuracy [b = -0.13, 95% CI [-0.16, -0.10]] across all tasks where performance was possible to assess (see Extended Data Figure 1a and 1b). In addition, the task accuracy analysis revealed a significant interaction between ‘Task’ and ‘Intrusive Distraction’ [F(7, 1387) = 4.26 , P < 0.001], indicating that the negative association between ‘Intrusive Distraction’ and accuracy was strongest in the Hard-Math [b = -0.31, adjusted 95% CI [-0.42, -0.20], t(1424) = -7.48, adjusted P < 0.001], Go/No-Go [b = -0.20, adjusted 95% CI [-0.34, -0.05], t(1425) = -3.66, adjusted P = 0.002], and 1-Back tasks [b = -0.15, adjusted 95% CI [-0.26, -0.03], t(1433) = -3.54, adjusted P = 0.003] (P-values and CIs for simple slopes Bonferroni-adjusted for 8 estimates; see Extended Data Figure 1c).

The task response time analysis revealed a significant interaction between ‘Task’ and ‘Intrusive Distraction’ [F(7, 1371) = 2.53 , P = 0.014]. Examination of the simple slopes of each level of ‘Tak’, Bonferroni-adjusted for 8 estimates, revealed no significant simple slopes and examination of the contrasts of the simple slopes, Tukey-adjusted for comparing a family of 8 estimates, revealed no significant comparisons. For completeness, the largest positive estimate was for the Hard-Math task [b = 0.11, adjusted 95% CI [-0.00, 0.21], t(1410) = 2.70, adjusted P = 0.405] and the largest negative estimate was for the 2-Back-Scenes task [b = -0.10, adjusted 95% CI [-0.23, 0.04], t(1409) = -1.97, adjusted P = 0.394] (P-value and CI Bonferroni-adjusted for 8 tasks; see Extended Figure 1d).

**Predicting Task Performance Metrics using Task Locations in CCA ‘State-Space’**

**Method**

To examine the associations between the dimensions of the ‘state-space’ and task performance, we ran two models in which the outcome variable was either mean accuracy or mean response time with ‘Task’ and the task-averages for each of the significant CCA dimension’s summed variates (1-4) as the explanatory variables. Two-way interactions between ‘Task’ and each of the CCA dimensions (1-4) were also included. The outcome variables (mean accuracy and response time) were z-scored, within each task separately, to adjust for differences in task demands across different tasks. Accordingly, in these models, the main effect of ‘Task’ can be ignored. Mean response time was calculated over correct trials only. In these models, cases exhibiting a z-scored response time or accuracy greater than 2.5 were considered outliers, and the z-scores of these outliers were set to zero to mitigate their influence on the results. The Bonferroni-adjusted alpha level was 0.025 for the two models (reported p-values unadjusted unless otherwise stated). Diagnostic plots confirmed there was homoscedasticity and normality of residuals for the response time analysis, however, the QQ plot and histogram indicated the normality assumption was violated (left skew) for the accuracy analysis. Therefore, the results from this model should be evaluated with caution. In total, data from 8 tasks was included in these models as the other 6 tasks did not record response time or accuracy (N observations = 1520).

Accuracy model formula: lmer(Z-scored Mean Accuracy ~ Task + Task-Mean CC1 + Task-Mean CC2 + Task-Mean CC3 + Task-Mean CC4 + Task: Task-Mean CC1 + Task: Task-Mean CC2 + Task: Task-Mean CC3 + Task: Task-Mean CC4 + Age + Gender + (1|Participant))

Response Time model formula: lmer(Z-scored Mean Response Time ~ Task + Task-Mean CC1 + Task-Mean CC2 + Task-Mean CC3 + Task-Mean CC4 + Task: Task-Mean CC1 + Task: Task-Mean CC2 + Task: Task-Mean CC3 + Task: Task-Mean CC4 + Age + Gender + (1|Participant))

**Results**

The task accuracy analysis revealed a significant main effect of ‘Deliberate Problem-solving’ [F(1, 1401) = 12.66, P < 0.001], indicating that ‘Deliberate Problem-Solving’ was associated with lower accuracy across all tasks in which accuracy could be assessed [b = -0.10, 95% CI [-0.15, -0.05]]. In addition, the task accuracy analysis revealed a significant main effect of ‘Intrusive Distraction’ [F(1, 1273) = 20.79, P < 0.001], indicating that ‘Intrusive Distraction’ was associated with lower accuracy [b = 0.10, 95% CI [-0.14, -0.6]]. There was also a significant main effect of ‘Inner Speech’ [F(1, 1433) = 11.76, P < 0.001], indicating that ‘Inner Speech’ was associated with higher accuracy [b = 0.07, 95% CI [0.03, 0.11]]. All significant main effects are presented in Extended Data Figure 4a. Finally, there was a significant interaction between ‘Intrusive Distraction’ and ‘Task’ [F(7, 1381) = 3.90, P < 0.001], indicating that ‘Intrusive Distraction’ was associated with the strongest negative influence on lower accuracy in the Hard-Math task [b = -0.34, adjusted 95% CI [-0.50, -0.19], t(1436) = -6.04, adjusted P < 0.001] (P-value and CI adjusted for 8 tasks; see Extended Data Figure 4b).

The response time analysis revealed a significant interaction between ‘Inner Speech and ‘Task’ [F(7, 1386) = 2.70, P = 0.009], indicating that ‘Inner Speech’ was associated with slower response time in the 2-Back-Scenes task [b = 0.27, adjusted 95% CI [0.08, 0.46], t(1416) = 3.87, adjusted P < 0.001] (P-value and CI adjusted for 8 tasks; see Extended Data Figure 4c).
